# Supplementary material for: Video in Survey Interviews: Effects on Data Quality and Respondent Experience
Source: PubMed Central journal article supplement (PMC10506842; doi:10.12758/mda.2022.13), 2023
Supplement: NIHMS1846806-supplement-appendix.pdf [file NIHMS1846806-supplement-appendix.pdf]

# Online-Appendix

## Video in Survey Interviews: Effects on Data Quality and Respondent Experience

|                                                                                                                                                                                                         |    |
|---------------------------------------------------------------------------------------------------------------------------------------------------------------------------------------------------------|----|
| <i>Supplementary Appendix A</i>                                                                                                                                                                         |    |
| Respondent's view by device type                                                                                                                                                                        | 2  |
| <i>Supplementary Appendix B</i>                                                                                                                                                                         |    |
| Item selection and questionnaire                                                                                                                                                                        | 4  |
| <i>Supplementary Appendix C</i>                                                                                                                                                                         |    |
| Online debriefing items administered immediately after respondents completed the survey                                                                                                                 | 10 |
| <i>Supplementary Appendix D</i>                                                                                                                                                                         |    |
| Interviewer training details                                                                                                                                                                            | 12 |
| <i>Supplementary Appendix E</i>                                                                                                                                                                         |    |
| Invitations and completions by sample source                                                                                                                                                            | 13 |
| <i>Supplementary Appendix F</i>                                                                                                                                                                         |    |
| Sample Composition by Gender, Age, Race and Education                                                                                                                                                   | 14 |
| <i>Supplementary Appendix G</i>                                                                                                                                                                         |    |
| Recruitment Procedure, Incentives and Scheduling                                                                                                                                                        | 15 |
| <i>Supplementary Appendix H</i>                                                                                                                                                                         |    |
| Terms Used in Final Models                                                                                                                                                                              | 16 |
| <i>Supplementary Appendix I</i>                                                                                                                                                                         |    |
| Numerical Estimates by Mode                                                                                                                                                                             | 18 |
| <i>Supplementary Appendix J</i>                                                                                                                                                                         |    |
| Percent "Strongly Favor" or "Strongly Agree" by mode; differences presumably due at least in part to mode differences in non-differentiation                                                            | 19 |
| <i>Supplementary Appendix K</i>                                                                                                                                                                         |    |
| Mean sensitivity of the selected responses for each item, where sensitivity is measured by the percent of online raters judging each response as very or somewhat uncomfortable for most people to give | 20 |
| <i>Supplementary Appendix L</i>                                                                                                                                                                         |    |
| Prevalence Estimates for Sensitive Behaviors by Mode                                                                                                                                                    | 21 |
| <i>Supplementary Appendix M</i>                                                                                                                                                                         |    |
| Technical Problems                                                                                                                                                                                      | 22 |
| <i>References</i>                                                                                                                                                                                       | 23 |

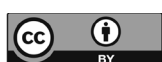

## Supplementary Appendix A

### Respondent's view by device type

#### 1) Live Video

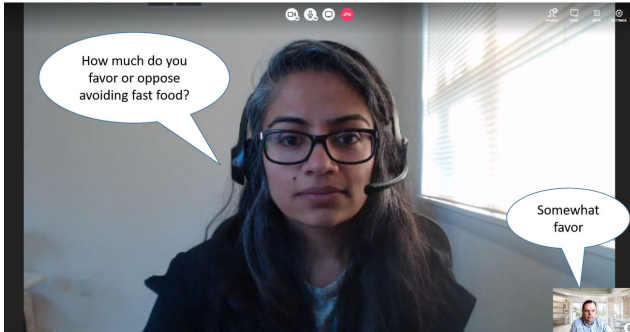

A) Respondent's desktop screen

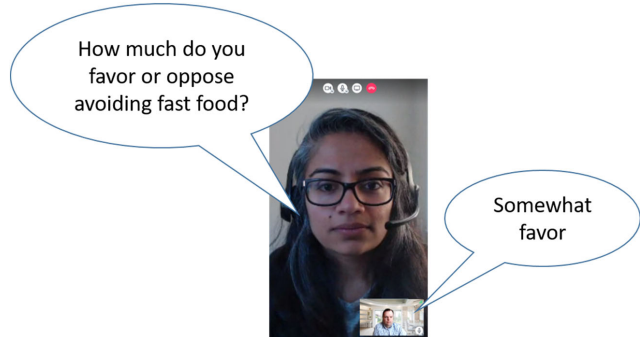

B) Respondent's mobile screen

Interviewer video fills most of the respondent's display. Respondent's self-view video thumbnail appears in the lower right corner. Speech bubbles contain text of a question the interviewer asked and a possible answer from the respondent.

#### 2) Prerecorded Video

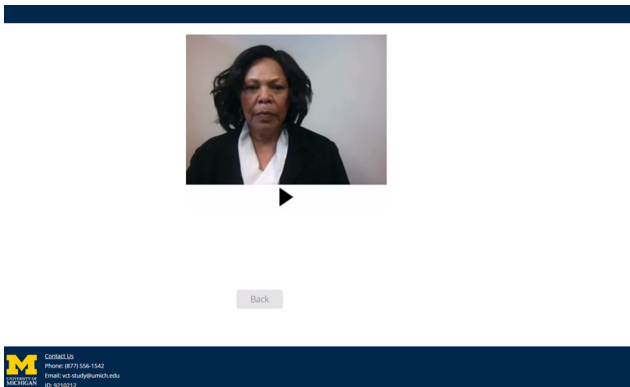

A) Respondent's desktop screen before the video of the interviewer reading the question is played (response options are hidden)

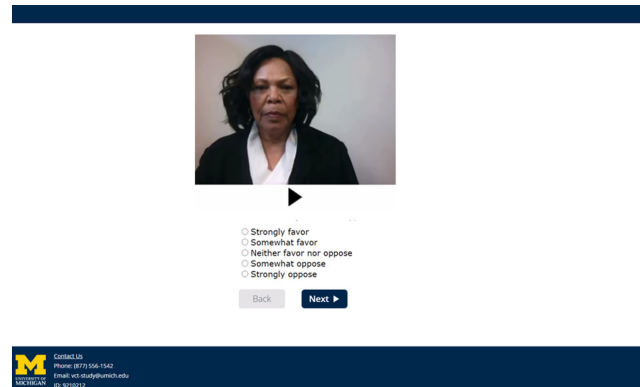

B) Respondent's desktop screen after the video of the interviewer reading the question is played (response options are displayed)

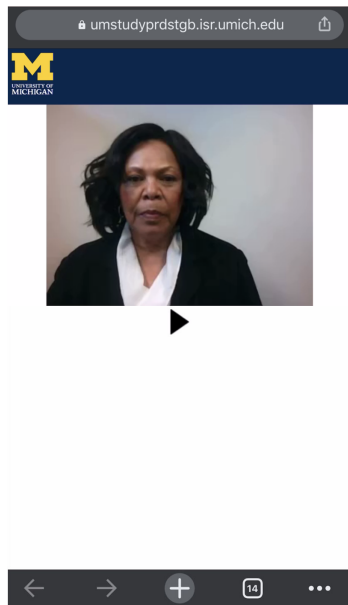

C) Respondent's mobile screen before the video of the interviewer reading the question is played (response options are hidden)

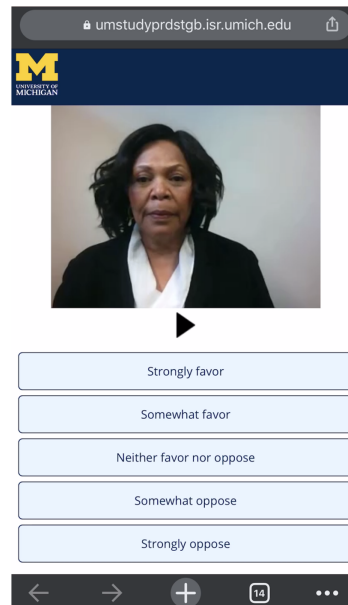

D) Respondent's mobile screen after the video of the interviewer reading the question is played (response options are displayed)

### 3) Web Survey

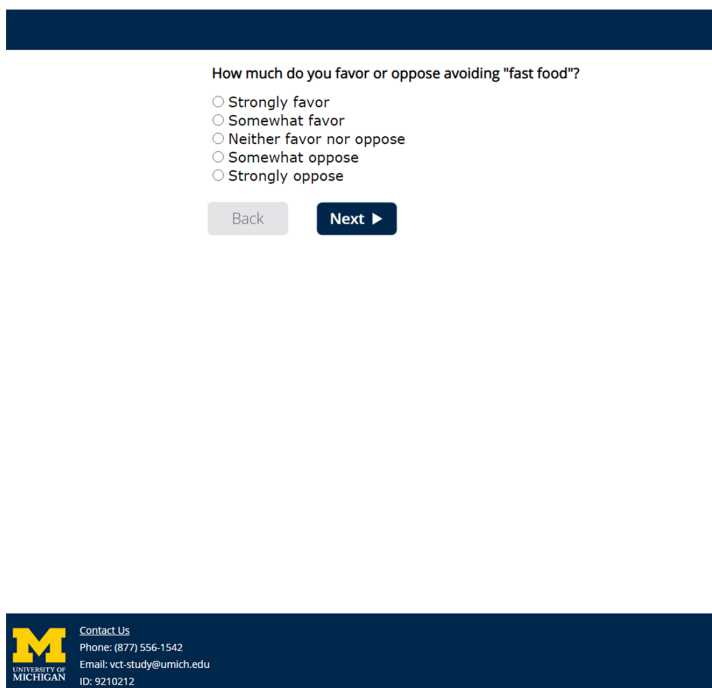

A) Respondent's desktop screen

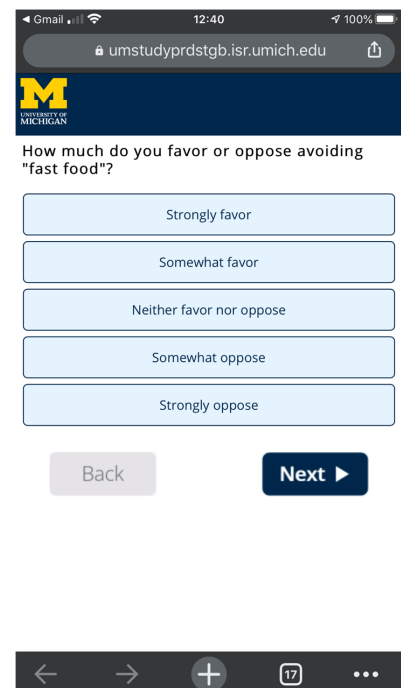

B) Respondent's mobile screen

## Supplementary Appendix B

### Item selection and questionnaire

Items relevant to current hypotheses from the Schober et al. (2015) and Lind et al. (2013) mode comparison studies, which themselves had been drawn from previously-fielded government and social scientific surveys, were considered, along with additional potential items listed in the Q-Bank repository (<https://wwwn.cdc.gov/QBANK/Home.aspx>) that would allow for the measurement of rounding and disclosure (e.g., questions that started with “How many”). In order to further test non-differentiation, two additional batteries were selected from previous studies in which non-differentiation had been observed (Liu & Cernat, 2018; Keusch & Yan, 2017). This led to a pool of 59 candidate items for this study.

Building on the empirical methods for judging question and response sensitivity in Feuer and Schober (2015, 2019) and Fail et al. (2021), all items (topics) were rated in an online study for the extent to which most people would be very uncomfortable, somewhat uncomfortable or completely comfortable to be asked each question and to provide each potential response (all categorical responses, and ranges of numeric responses selected based on response distributions from previously published studies [see Fail et al., 2020, p. 6 and endnotes 4 and 5, for more details about this method]). Response options that 50% or more of the raters judged would make most people uncomfortable to answer appear in red. A total of 447 raters recruited by CloudResearch were randomly assigned to rate different subsets of questions and response options, leading to about 150 ratings per topic and response option, in February 2019. These ratings were designed not only to allow for the selection of items to measure disclosure that would indeed be rated as sensitive, but also to verify that items selected to measure rounding and non-differentiation were not unintendedly sensitive.

The Sports battery (which included reverse-worded items, where providing the same answer to contradictory items would be clear evidence of low data quality) was placed later in the questionnaire to allow for potential observation of fatigue effects on non-differentiation. One less sensitive disclosure item (the question about elections) was moved to the final block of questions to promote questionnaire coherence (to after a battery question about government spending on sports).

| Question Text                                                                        | Data Quality Measure | Response Options                                                                                                                                                       |                                                                      | Study/Survey from Which Question Was Drawn |
|--------------------------------------------------------------------------------------|----------------------|------------------------------------------------------------------------------------------------------------------------------------------------------------------------|----------------------------------------------------------------------|--------------------------------------------|
|                                                                                      |                      | (*numerical questions were open-ended in actual study; raters were asked to rate sensitivity of ranges of responses based on evidence of prior response distributions) | Percent of Responses Rated as Very or Somewhat Uncomfortable to Give |                                            |
| On the <u>average day</u> , about how many hours do you personally watch television? | Rounding             | 0 hours                                                                                                                                                                | 23.9%                                                                | Schober et al. (2015)                      |
|                                                                                      |                      | 1 hour                                                                                                                                                                 | 17.6%                                                                |                                            |
|                                                                                      |                      | 2 hours                                                                                                                                                                | 15.0%                                                                |                                            |
|                                                                                      |                      | 3-5 hours                                                                                                                                                              | 31.2%                                                                |                                            |
|                                                                                      |                      | 6-10 hours                                                                                                                                                             | 59.0%                                                                |                                            |
| During the past <u>12 months</u> , how many movies have you seen in movie theaters?  | Rounding             | 11-20 hours                                                                                                                                                            | 65.9%                                                                | Schober et al. (2015)                      |
|                                                                                      |                      | 0 movies                                                                                                                                                               | 26.1%                                                                |                                            |
|                                                                                      |                      | 1-15 movies                                                                                                                                                            | 17.5%                                                                |                                            |
|                                                                                      |                      | 16-30 movies                                                                                                                                                           | 40.1%                                                                |                                            |
|                                                                                      |                      | 31-55 movies                                                                                                                                                           | 47.0%                                                                |                                            |
| During the past <u>12 months</u> , how many movies did you watch in any medium?      | Rounding             | 0 movies                                                                                                                                                               | 26.2%                                                                | Schober et al. (2015)                      |
|                                                                                      |                      | 1-15 movies                                                                                                                                                            | 16.9%                                                                |                                            |
|                                                                                      |                      | 16-30 movies                                                                                                                                                           | 31.6%                                                                |                                            |
|                                                                                      |                      | 31-50 movies                                                                                                                                                           | 46.7%                                                                |                                            |
| During the <u>last month</u> , how many times did you eat in restaurants?            | Rounding             | 0 times                                                                                                                                                                | 24.6%                                                                | Schober et al. (2015)                      |
|                                                                                      |                      | 1-15 times                                                                                                                                                             | 25.4%                                                                |                                            |
|                                                                                      |                      | 16-30 times                                                                                                                                                            | 55.3%                                                                |                                            |
|                                                                                      |                      | 31-50 times                                                                                                                                                            | 0.0%                                                                 |                                            |

| Question Text                                                                                                | Data Quality Measure               | Response Options<br>(*numerical questions were open-ended in actual study; raters were asked to rate sensitivity of ranges of responses based on evidence of prior response distributions) | Percent of Responses Rated as Very or Somewhat Uncomfortable to Give | Study/Survey from Which Question Was Drawn       |
|--------------------------------------------------------------------------------------------------------------|------------------------------------|--------------------------------------------------------------------------------------------------------------------------------------------------------------------------------------------|----------------------------------------------------------------------|--------------------------------------------------|
| During the <u>last month</u> , how many times did you eat spicy food?                                        | Rounding                           | 0 days                                                                                                                                                                                     | 18.7%                                                                | Schober et al. (2015)                            |
|                                                                                                              |                                    | 1-10 days                                                                                                                                                                                  | 21.2%                                                                |                                                  |
|                                                                                                              |                                    | 11-20 days                                                                                                                                                                                 | 23.0%                                                                |                                                  |
|                                                                                                              |                                    | 21-31 days                                                                                                                                                                                 | 26.9%                                                                |                                                  |
| During the <u>last month</u> , how many times did you shop in a grocery store?                               | Rounding                           | 0 times                                                                                                                                                                                    | 31.0%                                                                | Schober et al. (2015)                            |
|                                                                                                              |                                    | 1-15 times                                                                                                                                                                                 | 12.4%                                                                |                                                  |
|                                                                                                              |                                    | 16-30 times                                                                                                                                                                                | 47.2%                                                                |                                                  |
|                                                                                                              |                                    | 31-60 times                                                                                                                                                                                | 52.4%                                                                |                                                  |
| How many fluid ounces of plain drinking water did you drink <u>yesterday</u> from the tap or water fountain? | Rounding                           | 0 fluid ounces (1)                                                                                                                                                                         | 46.4%                                                                | Continuing Survey of Food Intakes by Individuals |
|                                                                                                              |                                    | 1-16 fluid ounces (2)                                                                                                                                                                      | 33.8%                                                                |                                                  |
|                                                                                                              |                                    | 17-32 fluid ounces (3)                                                                                                                                                                     | 24.2%                                                                |                                                  |
|                                                                                                              |                                    | 33-48 fluid ounces (4)                                                                                                                                                                     | 29.9%                                                                |                                                  |
|                                                                                                              |                                    | 49-64 fluid ounces (5)                                                                                                                                                                     | 27.5%                                                                |                                                  |
|                                                                                                              |                                    | More than 64 fluid ounces (6)                                                                                                                                                              | 35.9%                                                                |                                                  |
| How much do you favor or oppose avoiding “fast food”?                                                        | Non-differentiation (Food battery) | Strongly favor                                                                                                                                                                             | 33.3%                                                                | Schober et al. (2015)                            |
|                                                                                                              |                                    | Somewhat favor                                                                                                                                                                             | 31.6%                                                                |                                                  |
|                                                                                                              |                                    | Neither favor nor oppose                                                                                                                                                                   | 33.9%                                                                |                                                  |
|                                                                                                              |                                    | Somewhat oppose                                                                                                                                                                            | 42.4%                                                                |                                                  |
|                                                                                                              |                                    | Strongly oppose                                                                                                                                                                            | 40.5%                                                                |                                                  |
| How much do you favor or oppose maintaining a healthy diet?                                                  | Non-differentiation (Food battery) | Strongly favor                                                                                                                                                                             | 21.8%                                                                | Schober et al. (2015)                            |
|                                                                                                              |                                    | Somewhat favor                                                                                                                                                                             | 26.3%                                                                |                                                  |
|                                                                                                              |                                    | Neither favor nor oppose                                                                                                                                                                   | 37.4%                                                                |                                                  |
|                                                                                                              |                                    | Somewhat oppose                                                                                                                                                                            | 61.7%                                                                |                                                  |
|                                                                                                              |                                    | Strongly oppose                                                                                                                                                                            | 67.5%                                                                |                                                  |
| How much do you favor or oppose monitoring cholesterol levels closely?                                       | Non-differentiation (Food battery) | Strongly favor                                                                                                                                                                             | 25.8%                                                                | Schober et al. (2015)                            |
|                                                                                                              |                                    | Somewhat favor                                                                                                                                                                             | 28.1%                                                                |                                                  |
|                                                                                                              |                                    | Neither favor nor oppose                                                                                                                                                                   | 38.6%                                                                |                                                  |
|                                                                                                              |                                    | Somewhat oppose                                                                                                                                                                            | 54.5%                                                                |                                                  |
|                                                                                                              |                                    | Strongly oppose                                                                                                                                                                            | 59.5%                                                                |                                                  |
| How much do you favor or oppose emphasizing the taste of food rather than its nutritional value?             | Non-differentiation (Food battery) | Strongly favor                                                                                                                                                                             | 45.3%                                                                | Schober et al. (2015)                            |
|                                                                                                              |                                    | Somewhat favor                                                                                                                                                                             | 38.8%                                                                |                                                  |
|                                                                                                              |                                    | Neither favor nor oppose                                                                                                                                                                   | 40.4%                                                                |                                                  |
|                                                                                                              |                                    | Somewhat oppose                                                                                                                                                                            | 46.0%                                                                |                                                  |
|                                                                                                              |                                    | Strongly oppose                                                                                                                                                                            | 46.9%                                                                |                                                  |
| How much do you favor or oppose paying close attention to the nutritional information on food packaging?     | Non-differentiation (Food battery) | Strongly favor                                                                                                                                                                             | 20.7%                                                                | Schober et al. (2015)                            |
|                                                                                                              |                                    | Somewhat favor                                                                                                                                                                             | 20.2%                                                                |                                                  |
|                                                                                                              |                                    | Neither favor nor oppose                                                                                                                                                                   | 34.5%                                                                |                                                  |
|                                                                                                              |                                    | Somewhat oppose                                                                                                                                                                            | 52.2%                                                                |                                                  |
|                                                                                                              |                                    | Strongly oppose                                                                                                                                                                            | 53.0%                                                                |                                                  |
| How much do you favor or oppose limiting the amount of red meat in your diet?                                | Non-differentiation (Food battery) | Strongly favor                                                                                                                                                                             | 32.5%                                                                | Schober et al. (2015)                            |
|                                                                                                              |                                    | Somewhat favor                                                                                                                                                                             | 32.5%                                                                |                                                  |
|                                                                                                              |                                    | Neither favor nor oppose                                                                                                                                                                   | 41.7%                                                                |                                                  |
|                                                                                                              |                                    | Somewhat oppose                                                                                                                                                                            | 45.3%                                                                |                                                  |
|                                                                                                              |                                    | Strongly oppose                                                                                                                                                                            | 46.5%                                                                |                                                  |

| Question Text                                                                                                                                                                         | Data Quality Measure                | Response Options<br>(*numerical questions were open-ended in actual study; raters were asked to rate sensitivity of ranges of responses based on evidence of prior response distributions) | Percent of Responses Rated as Very or Somewhat Uncomfortable to Give  | Study/Survey from Which Question Was Drawn |
|---------------------------------------------------------------------------------------------------------------------------------------------------------------------------------------|-------------------------------------|--------------------------------------------------------------------------------------------------------------------------------------------------------------------------------------------|-----------------------------------------------------------------------|--------------------------------------------|
| How much do you favor or oppose balancing one's diet across the key food groups?                                                                                                      | Non-differentiation (Food battery)  | Strongly favor<br>Somewhat favor<br>Neither favor nor oppose<br>Somewhat oppose<br>Strongly oppose                                                                                         | 20.9%<br>29.8%<br>40.5%<br><b>53.1%</b><br><b>53.1%</b>               | Schober et al. (2015)                      |
| Please indicate to what extent you agree or disagree with the following statement:<br><br>It is important to me to have really nice things.                                           | Non-differentiation (Money battery) | Strongly agree<br>Somewhat agree<br>Neither agree nor disagree<br>Somewhat disagree<br>Strongly disagree                                                                                   | 37.5%<br>36.1%<br>32.1%<br>40.2%<br>46.8%                             | Keusch & Yan (2017)                        |
| Please indicate to what extent you agree or disagree with the following statement:<br><br>I would like to be rich enough to buy anything I want.                                      | Non-differentiation (Money battery) | Strongly agree<br>Somewhat agree<br>Neither agree nor disagree<br>Somewhat disagree<br>Strongly disagree                                                                                   | 24.8%<br>24.3%<br>27.4%<br>37.7%<br>41.8%                             | Keusch & Yan (2017)                        |
| Please indicate to what extent you agree or disagree with the following statement:<br><br>I'd be happier if I could afford to buy more things.                                        | Non-differentiation (Money battery) | Strongly agree<br>Somewhat agree<br>Neither agree nor disagree<br>Somewhat disagree<br>Strongly disagree                                                                                   | 36.0%<br>38.0%<br>36.1%<br>43.9%<br>43.9%                             | Keusch & Yan (2017)                        |
| Please indicate to what extent you agree or disagree with the following statement:<br><br>It sometimes bothers me quite a bit that I can't afford to buy all the things I would like. | Non-differentiation (Money battery) | Strongly agree<br>Somewhat agree<br>Neither agree nor disagree<br>Somewhat disagree<br>Strongly disagree                                                                                   | <b>56.8%</b><br><b>61.3%</b><br>48.6%<br><b>53.7%</b><br><b>52.3%</b> | Keusch & Yan (2017)                        |
| Please indicate to what extent you agree or disagree with the following statement:<br><br>It's really true that money can buy happiness.                                              | Non-differentiation (Money battery) | Strongly agree<br>Somewhat agree<br>Neither agree nor disagree<br>Somewhat disagree<br>Strongly disagree                                                                                   | <b>57.0%</b><br><b>58.9%</b><br>49.6%<br><b>51.4%</b><br>47.3%        | Keusch & Yan (2017)                        |
| Please indicate to what extent you agree or disagree with the following statement:<br><br>The things I own give me a great deal of pleasure.                                          | Non-differentiation (Money battery) | Strongly agree<br>Somewhat agree<br>Neither agree nor disagree<br>Somewhat disagree<br>Strongly disagree                                                                                   | 28.2%<br>25.7%<br>33.0%<br>49.1%<br>49.5%                             | Keusch & Yan (2017)                        |

| Question Text                                                                                                                                      | Data Quality Measure                 | Response Options<br>(*numerical questions were open-ended in actual study; raters were asked to rate sensitivity of ranges of responses based on evidence of prior response distributions) | Percent of Responses Rated as Very or Somewhat Uncomfortable to Give             | Study/Survey from Which Question Was Drawn                |
|----------------------------------------------------------------------------------------------------------------------------------------------------|--------------------------------------|--------------------------------------------------------------------------------------------------------------------------------------------------------------------------------------------|----------------------------------------------------------------------------------|-----------------------------------------------------------|
| How often do you pay off the total balance on your credit card(s) each month?                                                                      | Disclosure                           | Almost always<br>Sometimes<br>Hardly ever<br>Not applicable                                                                                                                                | 34.8%<br><b>65.2%</b><br><b>72.4%</b><br>NA                                      | Survey of Consumer Finances, Survey of Consumer Attitudes |
| How often do you attend religious services?                                                                                                        | Disclosure                           | At least once a week<br>Almost every week<br>About once a month<br>Seldom<br>Never                                                                                                         | 26.1%<br>30.5%<br><b>50.8%</b><br><b>62.6%</b><br><b>65.9%</b>                   | Schober et al. (2015)                                     |
| During the past 12 months, how often have you offered your seat on a bus or in a public place to a stranger who was standing?                      | Disclosure                           | Not at all in the past year<br>Once in the past year<br>Two or three times a year<br>Once a month<br>Once a week<br>More than once a week<br>Don't know                                    | <b>54.4%</b><br>48.6%<br>42.6%<br>34.6%<br>24.8%<br>23.0%<br>42.2%               | General Social Survey                                     |
| During the past 12 months, how often have you done volunteer work for a charity?                                                                   | Disclosure                           | Not at all in the past year<br>Once in the past year<br>Two or three times a year<br>Once a month<br>Once a week<br>More than once a week<br>Don't know                                    | <b>68.5%</b><br>43.6%<br>25.0%<br>21.1%<br>20.7%<br><b>59.0%</b><br>NA           | General Social Survey                                     |
| During the past 12 months, how often have you given food or money to a homeless person?                                                            | Disclosure                           | Not at all in the past year<br>Once in the past year<br>Two or three times a year<br>Once a month<br>Once a week<br>More than once a week<br>Don't know                                    | <b>68.9%</b><br>48.7%<br>34.7%<br>33.6%<br>37.4%<br><b>55.1%</b><br>NA           | General Social Survey                                     |
| To what extent do you agree or disagree with the following statement:<br>There is too much sport on TV.                                            | Non-differentiation (Sports battery) | Strongly agree<br>Agree<br>Somewhat agree<br>Neither agree nor disagree<br>Somewhat disagree<br>Disagree<br>Strongly disagree                                                              | 35.9%<br>38.5%<br>35.8%<br>31.8%<br>40.2%<br>43.9%<br>41.1%                      | Liu & Cernat (2018)                                       |
| To what extent do you agree or disagree with the following statement:<br>Sports bring different groups and races inside a country closer together. | Non-differentiation (Sports battery) | Strongly agree<br>Agree<br>Somewhat agree<br>Neither agree nor disagree<br>Somewhat disagree<br>Disagree<br>Strongly disagree                                                              | 31.9%<br>31.2%<br>36.4%<br>46.2%<br><b>62.6%</b><br><b>61.2%</b><br><b>61.0%</b> | Liu & Cernat (2018)                                       |

| Question Text                                                                                                                  | Data Quality Measure                 | Response Options<br>(*numerical questions were open-ended in actual study; raters were asked to rate sensitivity of ranges of responses based on evidence of prior response distributions) | Percent of Responses Rated as Very or Somewhat Uncomfortable to Give | Study/Survey from Which Question Was Drawn      |
|--------------------------------------------------------------------------------------------------------------------------------|--------------------------------------|--------------------------------------------------------------------------------------------------------------------------------------------------------------------------------------------|----------------------------------------------------------------------|-------------------------------------------------|
| To what extent do you agree or disagree with the following statement:                                                          |                                      | Strongly agree                                                                                                                                                                             | 56.8%                                                                |                                                 |
| International sports competitions create more tension between countries than good feelings.                                    | Non-differentiation (Sports battery) | Agree                                                                                                                                                                                      | 57.1%                                                                | Liu & Cernat (2018)                             |
|                                                                                                                                |                                      | Somewhat agree                                                                                                                                                                             | 51.0%                                                                |                                                 |
|                                                                                                                                |                                      | Neither agree nor disagree                                                                                                                                                                 | 48.1%                                                                |                                                 |
|                                                                                                                                |                                      | Somewhat disagree                                                                                                                                                                          | 50.0%                                                                |                                                 |
|                                                                                                                                |                                      | Disagree                                                                                                                                                                                   | 53.4%                                                                |                                                 |
|                                                                                                                                |                                      | Strongly disagree                                                                                                                                                                          | 51.4%                                                                |                                                 |
| To what extent do you agree or disagree with the following statement:                                                          |                                      | Strongly agree                                                                                                                                                                             | 53.2%                                                                |                                                 |
| Governments should spend more money on sports.                                                                                 | Non-differentiation (Sports battery) | Agree                                                                                                                                                                                      | 54.3%                                                                | Liu & Cernat (2018)                             |
|                                                                                                                                |                                      | Somewhat agree                                                                                                                                                                             | 53.3%                                                                |                                                 |
|                                                                                                                                |                                      | Neither agree nor disagree                                                                                                                                                                 | 49.5%                                                                |                                                 |
|                                                                                                                                |                                      | Somewhat disagree                                                                                                                                                                          | 49.0%                                                                |                                                 |
|                                                                                                                                |                                      | Disagree                                                                                                                                                                                   | 47.6%                                                                |                                                 |
|                                                                                                                                |                                      | Strongly disagree                                                                                                                                                                          | 47.1%                                                                |                                                 |
| What about local elections – do you always vote in those, do you sometimes miss one, do you rarely vote, or do you never vote? | Disclosure                           | Always vote                                                                                                                                                                                | 23.0%                                                                | General Social Survey                           |
|                                                                                                                                |                                      | Sometimes miss one                                                                                                                                                                         | 45.8%                                                                |                                                 |
|                                                                                                                                |                                      | Rarely vote                                                                                                                                                                                | 71.8%                                                                |                                                 |
|                                                                                                                                |                                      | Never vote                                                                                                                                                                                 | 73.9%                                                                |                                                 |
| About how often did you have sex during the last 12 months?                                                                    | Disclosure                           | Not at all                                                                                                                                                                                 | 85.0%                                                                | Schober et al. (2015);<br>General Social Survey |
|                                                                                                                                |                                      | Once or twice                                                                                                                                                                              | 83.4%                                                                |                                                 |
|                                                                                                                                |                                      | About once a month                                                                                                                                                                         | 75.3%                                                                |                                                 |
|                                                                                                                                |                                      | 2 or 3 times a month                                                                                                                                                                       | 70.3%                                                                |                                                 |
|                                                                                                                                |                                      | Once a week                                                                                                                                                                                | 65.5%                                                                |                                                 |
|                                                                                                                                |                                      | 2 or 3 times a week                                                                                                                                                                        | 67.6%                                                                |                                                 |
|                                                                                                                                |                                      | 4 or more times a week                                                                                                                                                                     | 66.0%                                                                |                                                 |
| How many sex partners have you had in the last 12 months?                                                                      | Disclosure                           | 0                                                                                                                                                                                          | 59.73%                                                               | Schober et al. (2015);<br>General Social Survey |
|                                                                                                                                |                                      | 1                                                                                                                                                                                          | 47.30%                                                               |                                                 |
|                                                                                                                                |                                      | 2                                                                                                                                                                                          | 75.32%                                                               |                                                 |
|                                                                                                                                |                                      | 3-4                                                                                                                                                                                        | 85.42%                                                               |                                                 |
|                                                                                                                                |                                      | 5-6                                                                                                                                                                                        | 88.89%                                                               |                                                 |
|                                                                                                                                |                                      | 7-8                                                                                                                                                                                        | 90.92%                                                               |                                                 |
|                                                                                                                                |                                      | 9-10                                                                                                                                                                                       | 91.67%                                                               |                                                 |
| Now thinking about the time since your 18 <sup>th</sup> birthday, how many female partners have you had sex with?              | Disclosure                           | 0                                                                                                                                                                                          | 71.62%                                                               | Schober et al. (2015);<br>General Social Survey |
|                                                                                                                                |                                      | 1                                                                                                                                                                                          | 67.61%                                                               |                                                 |
|                                                                                                                                |                                      | 2                                                                                                                                                                                          | 73.61%                                                               |                                                 |
|                                                                                                                                |                                      | 3-5                                                                                                                                                                                        | 81.25%                                                               |                                                 |
|                                                                                                                                |                                      | 6-10                                                                                                                                                                                       | 88.65%                                                               |                                                 |
|                                                                                                                                |                                      | 11-20                                                                                                                                                                                      | 88.57%                                                               |                                                 |
|                                                                                                                                |                                      | 21-100                                                                                                                                                                                     | 87.86%                                                               |                                                 |



| Question Text                                                                                                                                   | Data Quality Measure | Response Options<br>(*numerical questions were open-ended in actual study; raters were asked to rate sensitivity of ranges of responses based on evidence of prior response distributions) | Percent of Responses Rated as Very or Somewhat Uncomfortable to Give | Study/Survey from Which Question Was Drawn         |
|-------------------------------------------------------------------------------------------------------------------------------------------------|----------------------|--------------------------------------------------------------------------------------------------------------------------------------------------------------------------------------------|----------------------------------------------------------------------|----------------------------------------------------|
| Thinking about the time since your 18 <sup>th</sup> birthday, how many male partners have you had sex with?                                     | Disclosure           | 0                                                                                                                                                                                          | 57.24%                                                               | Schober et al. (2015);<br>General Social<br>Survey |
|                                                                                                                                                 |                      | 1                                                                                                                                                                                          | 61.81%                                                               |                                                    |
|                                                                                                                                                 |                      | 2                                                                                                                                                                                          | 72.22%                                                               |                                                    |
|                                                                                                                                                 |                      | 3-5                                                                                                                                                                                        | 85.21%                                                               |                                                    |
|                                                                                                                                                 |                      | 6-10                                                                                                                                                                                       | 90.14%                                                               |                                                    |
|                                                                                                                                                 |                      | 11-20                                                                                                                                                                                      | 91.43%                                                               |                                                    |
| During the past 12 months, have your sex partners been exclusively male, exclusively female, both male and female, or have you had no partners? | Disclosure           | Exclusively male                                                                                                                                                                           | 81.2%                                                                | Schober et al. (2015);<br>General Social<br>Survey |
|                                                                                                                                                 |                      | Exclusively female                                                                                                                                                                         | 48.3%                                                                |                                                    |
|                                                                                                                                                 |                      | Both male & female                                                                                                                                                                         | 89.4%                                                                |                                                    |
|                                                                                                                                                 |                      | No partners                                                                                                                                                                                | 69.3%                                                                |                                                    |
| In the past 30 days, how often have you visited a website for sexually explicit material?                                                       | Disclosure           | Never                                                                                                                                                                                      | 39.5%                                                                | General Social<br>Survey                           |
|                                                                                                                                                 |                      | 1-2 times                                                                                                                                                                                  | 79.4%                                                                |                                                    |
|                                                                                                                                                 |                      | 3-5 times                                                                                                                                                                                  | 87.7%                                                                |                                                    |
|                                                                                                                                                 |                      | More than 5 times                                                                                                                                                                          | 88.7%                                                                |                                                    |

## Supplementary Appendix C

### Online debriefing items administered immediately after respondents completed the survey

| Question                                                                                                                                                                                                                     | Response Options                                                                                                                                                                       |
|------------------------------------------------------------------------------------------------------------------------------------------------------------------------------------------------------------------------------|----------------------------------------------------------------------------------------------------------------------------------------------------------------------------------------|
| Overall, how satisfied were you with this survey?                                                                                                                                                                            | <ol style="list-style-type: none"> <li>1. Not at all satisfied</li> <li>2.</li> <li>3.</li> <li>4.</li> <li>5. Very satisfied</li> </ol>                                               |
| [Live Video and Prerecorded Video]<br>Overall, how comfortable were you with the interviewer?                                                                                                                                | <ol style="list-style-type: none"> <li>1. Not at all comfortable</li> <li>2.</li> <li>3.</li> <li>4.</li> <li>5. Very comfortable</li> </ol>                                           |
| [Live Video]<br>How much did you enjoy interacting with the interviewer?                                                                                                                                                     | <ol style="list-style-type: none"> <li>1. Did not enjoy at all</li> <li>2.</li> <li>3.</li> <li>4.</li> <li>5. Thoroughly enjoyed</li> </ol>                                           |
| [Live Video and Prerecorded Video]<br>How personally connected did you feel to the interviewer?                                                                                                                              | <ol style="list-style-type: none"> <li>1. Distant</li> <li>2.</li> <li>3.</li> <li>4.</li> <li>5. Close</li> </ol>                                                                     |
| How often did you feel that you were able to answer the questions honestly?                                                                                                                                                  | <ul style="list-style-type: none"> <li>– Always</li> <li>– Most of the time</li> <li>– Some of the time</li> <li>– Never</li> </ul>                                                    |
| Imagine you had been asked the survey questions in person, that is, in a face-to-face interview. Did the survey you just completed feel more private, the same, or less private than being asked the questions face-to-face? | <ul style="list-style-type: none"> <li>– More private</li> <li>– The same</li> <li>– Less private</li> </ul>                                                                           |
| Did anyone nearby affect the way you answered the questions?                                                                                                                                                                 | <ul style="list-style-type: none"> <li>– No, the people nearby did not affect my answers</li> <li>– Yes, the people nearby affected my answers</li> <li>– No one was around</li> </ul> |
| How sensitive did you feel the survey questions were?                                                                                                                                                                        | <ol style="list-style-type: none"> <li>1. Not at all sensitive</li> <li>2.</li> <li>3.</li> <li>4.</li> <li>5. Very sensitive</li> </ol>                                               |
| [Live Video and Prerecorded Video]<br>Did you experience any of the following at any point during the interview?                                                                                                             |                                                                                                                                                                                        |
| No audio                                                                                                                                                                                                                     |                                                                                                                                                                                        |
| Distorted or muffled speech                                                                                                                                                                                                  |                                                                                                                                                                                        |
| Background noise                                                                                                                                                                                                             |                                                                                                                                                                                        |
| Echo                                                                                                                                                                                                                         |                                                                                                                                                                                        |
| Volume too soft                                                                                                                                                                                                              |                                                                                                                                                                                        |
| Interrupted speech<br>(i.e., you and the interviewer were speaking at the same time) [VM]                                                                                                                                    |                                                                                                                                                                                        |
| No video                                                                                                                                                                                                                     |                                                                                                                                                                                        |
| Frozen or distorted video                                                                                                                                                                                                    |                                                                                                                                                                                        |
| Trouble seeing what was on the screen clearly                                                                                                                                                                                |                                                                                                                                                                                        |
| Video and audio out of sync                                                                                                                                                                                                  |                                                                                                                                                                                        |
| Other technical problem (please specify)                                                                                                                                                                                     |                                                                                                                                                                                        |
|                                                                                                                                                                                                                              | For each item:                                                                                                                                                                         |
|                                                                                                                                                                                                                              | – Yes                                                                                                                                                                                  |
|                                                                                                                                                                                                                              | – No                                                                                                                                                                                   |

| Question                                                                                                               | Response Options                                                                                                                                                                                                                                               |
|------------------------------------------------------------------------------------------------------------------------|----------------------------------------------------------------------------------------------------------------------------------------------------------------------------------------------------------------------------------------------------------------|
| IF YES TO ANY OF THE ABOVE:<br>Was the [problem] resolved?                                                             | <ul style="list-style-type: none"> <li>- No</li> <li>- Yes, it resolved itself</li> <li>- Yes, I was able to resolve it myself</li> <li>- Yes, someone helped me resolve it</li> </ul>                                                                         |
| How often do you participate in live video calls on any device?                                                        | <ul style="list-style-type: none"> <li>- More than once a week</li> <li>- Weekly</li> <li>- Monthly</li> <li>- A few times a year</li> <li>- Once a year</li> <li>- Seldom or never</li> </ul>                                                                 |
| Were you doing something else during the interview?                                                                    | <ul style="list-style-type: none"> <li>- Yes</li> <li>- No</li> </ul>                                                                                                                                                                                          |
| IF YES:<br>What else were you doing during the interview?                                                              | [open-ended]                                                                                                                                                                                                                                                   |
| If there is anything else you would like to mention about your experience with the interviewer, please record it here. | [open-ended]                                                                                                                                                                                                                                                   |
| What is the highest level of education that you have completed?                                                        | <ul style="list-style-type: none"> <li>- Not a high school graduate</li> <li>- High school graduate (or GED)</li> <li>- Some college</li> <li>- Vocational or associate degree</li> <li>- Bachelor's degree</li> <li>- Graduate degree</li> </ul>              |
| What is your annual household income from all sources?                                                                 | <ul style="list-style-type: none"> <li>- \$25,000 or less</li> <li>- \$25,000 to \$50,000</li> <li>- \$50,000 to \$75,000</li> <li>- \$75,000 or more</li> <li>- Decline to answer</li> </ul>                                                                  |
| How do you identify yourself?                                                                                          | <ul style="list-style-type: none"> <li>- Male</li> <li>- Female</li> <li>- Nonbinary</li> </ul>                                                                                                                                                                |
| How do you identify yourself? [check all that apply]                                                                   | <ul style="list-style-type: none"> <li>- Black or African American</li> <li>- White</li> <li>- American Indian, Native American, or Alaskan Native</li> <li>- Asian</li> <li>- Native Hawaiian or Other Pacific Islander</li> <li>- Other (specify)</li> </ul> |
| How many people (including yourself) are living or staying at this address?                                            | [open-ended]                                                                                                                                                                                                                                                   |

## **Supplementary Appendix D**

### **Interviewer training details**

Interviewers were trained for live video interviewing as a group in a single session. They were instructed to follow standardized interviewing procedures (the University of Michigan's General Interviewer Training). They were also instructed about technical aspects of the BlueJeans video platform and on using the Blaise survey software (which they all regularly used) on the same screen. This included training interviewers on fixes that often work for a small set of technical issues that we thought a priori were most likely to occur (e.g., advising respondents to check microphone or camera connections, reconnecting to the video call or advising the respondent to reconnect, or even rebooting either participants' device). We also provided resources for interviewers for obtaining additional technical support and for rescheduling if necessary.

Interviewers were also trained on protocols for following up via email with a respondent who did not show up to a scheduled interview after 5 minutes, indicating that they would keep the video meeting open and be available to conduct the interview for another 10 minutes. They were asked to complete a brief post-interview questionnaire after each video interview to document any technical issues that had occurred from their perspective.

## Supplementary Appendix E

### Invitations and completions by sample source

Final sample sizes in the three modes for both sample sources. For all sample sources, “Invitations” is the number of initial personal invitations requesting participation that were sent. The percentages reported here should not be confused with any AAPOR response rate. For both CloudResearch and MICHR, this percentage is more appropriately characterized as a participation rate (The American Association for Public Opinion Research 2016) or completion rate (Callegaro & DiSogra, 2008), as we do not know how many people were exposed to the study invitation(s), only how many were issued unique links to the survey instrument.

|               |               |             | Mode       |                   |        |        |
|---------------|---------------|-------------|------------|-------------------|--------|--------|
|               |               |             | Live Video | Prerecorded Video | Web    | Total  |
| Sample Source | CloudResearch | Invitations | 5500       | 1120              | 445    | 7065   |
|               |               | Completes   | 76         | 303               | 337    | 716    |
|               |               | Rate        | 1.42%      | 27.05%            | 75.73% | 10.13% |
|               | MICHR         | Invitations | 283        | 105               | 97     | 485    |
|               |               | Completes   | 203        | 82                | 66     | 351    |
|               |               | Rate        | 71.73%     | 78.10%            | 68.04% | 72.37% |
| Total         | Invitations   | 5783        | 1225       | 542               | 7550   |        |
|               | Completes     | 279         | 385        | 403               | 1067   |        |
|               | Rate          | 4.82%       | 31.43%     | 74.35%            | 14.13% |        |

## Supplementary Appendix F

### Sample Composition by Gender, Age, Race and Education. Sample size appears in parentheses

| Gender | Age        | Race      | Education    | 2018 CPS<br>Proportion | Live Video<br>Proportion<br>n=276 | Prerecorded Video<br>Proportion<br>n=380 | Web<br>Proportion<br>n=402 |
|--------|------------|-----------|--------------|------------------------|-----------------------------------|------------------------------------------|----------------------------|
| Male   | < 65 years | White     | HS and less  | 0.12                   | 0.025<br>(7)                      | 0.065<br>(25)                            | 0.08<br>(34)               |
|        |            |           | More than HS | 0.18                   | 0.18<br>(49)                      | 0.13<br>(48)                             | 0.12<br>(47)               |
|        |            | Non-white | HS and less  | 0.04                   | 0.02<br>(5)                       | 0.02<br>(8)                              | 0.02<br>(10)               |
|        |            |           | More than HS | 0.05                   | 0.04<br>(12)                      | 0.04<br>(17)                             | 0.04<br>(16)               |
|        | >=65 years | White     | HS and less  | 0.03                   | 0.01<br>(2)                       | 0.05<br>(18)                             | 0.04<br>(18)               |
|        |            |           | More than HS | 0.05                   | 0.07<br>(21)                      | 0.07<br>(27)                             | 0.08<br>(31)               |
|        |            | Non-white | HS and less  | 0.01                   | 0.00<br>(0)                       | 0.01<br>(4)                              | 0.01<br>(3)                |
|        |            |           | More than HS | 0.01                   | 0.01<br>(4)                       | 0.02<br>(7)                              | 0.01<br>(5)                |
| Female | < 65 years | White     | HS and less  | 0.10                   | 0.065<br>(18)                     | 0.06<br>(24)                             | 0.06<br>(26)               |
|        |            |           | More than HS | 0.20                   | 0.315<br>(87)                     | 0.24<br>(91)                             | 0.23<br>(93)               |
|        |            | Non-white | HS and less  | 0.04                   | 0.01<br>(4)                       | 0.02<br>(7)                              | 0.02<br>(8)                |
|        |            |           | More than HS | 0.06                   | 0.08<br>(22)                      | 0.09<br>(34)                             | 0.05<br>(19)               |
|        | >=65 years | White     | HS and less  | 0.04                   | 0.03<br>(9)                       | 0.07<br>(26)                             | 0.10<br>(39)               |
|        |            |           | More than HS | 0.05                   | 0.10<br>(28)                      | 0.08<br>(32)                             | 0.09<br>(38)               |
|        |            | Non-white | HS and less  | 0.01                   | 0.01<br>(2)                       | 0.015<br>(6)                             | 0.01<br>(6)                |
|        |            |           | More than HS | 0.01                   | 0.02<br>(6)                       | 0.02<br>(6)                              | 0.02<br>(9)                |

*Note:* Differences in numbers of cases from totals reported elsewhere are due to incomplete demographic data (9 total cases).

## Supplementary Appendix G

### Recruitment Procedure, Incentives and Scheduling

CloudResearch recruits participants from multiple online opt-in panels (Prime Panels). In the current study, CloudResearch invited panelists who had confirmed being 18 years of age or older to complete the survey, offering them \$5 or the type and amount of compensation (reward points, gift cards) to which they had previously agreed to with their panel. Our difficulty recruiting sample members to participate in live video interviews using an ABS approach raised the possibility that the participation rate in this mode might also be lower in live video than the other modes in opt-in sample sources. Thus we asked CloudResearch to randomly assign panelists (prior to their answering any survey questions) to live video interviews at a higher rate than the other modes, initially inviting 60% to live video, 20% to prerecorded video, 20% to the web survey. The number of invitations to participate in each mode increased until we reached our target or, in the case of live video, were no longer able to produce completed cases. Sample members assigned to the live video mode were promised an additional \$15 (in the form of an Amazon gift code) for completing the survey, to encourage participation despite 1) the extra task of scheduling an interview for a later time (when the interviewer to whom they had been assigned would be available) and 2) participating using a mode with which they might be unfamiliar and which involved greater social contact than the textual web surveys to which they typically respond. Once data collection in the two self-administered modes was completed, all remaining potential respondents were assigned to live video.

Our target of 280 participants in the prerecorded video and web survey modes was reached quickly, but after 76 participants had completed live video interviews it became apparent that the pool of panelists willing to schedule interviews in this mode had been exhausted. Recruitment for live video was then redirected to the MICHHR pool whose members were offered a \$20 Amazon gift code to complete a live video interview. Once the target number of live video interviews had been conducted, we recruited additional MICHHR participants, offering them the same incentive and randomly assigning them to one of the two self-administered modes; this was done to ensure that mode would not be confounded with sample source and that both sources would be represented in all modes.

Changing our recruitment strategy over the course of data collection led to a corresponding change in how live video interviews were scheduled. Participants from CloudResearch were required to schedule interviews only at times when their randomly assigned interviewer was available (even though this would likely reduce or delay participation.) In our implementation, schedule slots were particularly restricted because of our intention to randomly assign respondents to interviewers during the hours they were available so as to allow measurement of potential interviewer effects (reported elsewhere) even though this might delay or reduce participation.

## Supplementary Appendix H

### Terms Used in Final Models

#### Rounding

##### *Overall*

Rounding: Mode + Age + VideoExperience + SampleSource

RoundingBinary: Mode + Age + VideoExperience + Sample Source + Mode\*Age

##### *Items*

TelevisionHours: Mode + Age + Education + SampleSource

MovieTheaterYear: Mode + Age + Gender + Mode\*Device

MoviesYear: Mode + Age + SampleSource + Mode\*Age

RestaurantsMonth: Mode + Age + SampleSource

SpicyFood: Mode + Age + Race + Gender + SampleSource + Device

GroceryStore: Mode + Age + SampleSource + Device

DrinkingWater ~ Mode + Age + VideoExperience + SampleSource

#### Non-differentiation

##### *Overall*

Straightlining: Mode + Age + Gender + VideoExperience + SampleSource + Mode\*Age

##### *Individual Batteries*

Food Battery: Mode + Age + Education + Gender + SampleSource + Device

Money Battery: Mode + Age + Gender + SampleSource + Mode\*Age

Sports Battery: Mode + Age + VideoExperience + SampleSource

##### *Food Battery Questions*

FastFood: Mode + Age + VideoExperience + SampleSource + Device + Mode\*Age

HealthyDiet: Mode + Age + Race + VideoExperience + SampleSource + Device

Cholesterol: Mode + Age + Education + Race + SampleSource

NutritionalValue: Mode + Age + Gender + SampleSource + Mode\*Age

FoodPackaging: Mode + Age + Education + VideoExperience + SampleSource + Mode\*Age

MeatDiet: Mode + Age + Gender + VideoExperience + SampleSource + Mode\*Age

FoodGroups: Mode + Age + Education + VideoExperience + SampleSource

##### *Money Battery Statements*

NiceThings: Mode + Age + Race + VideoExperience + SampleSource

BuyAnything: Mode + Age + Race + Gender + SampleSource

BuyMoreThings: Mode + Age + Race + Gender + SampleSource

Bother: Mode + Age + Education + Race + SampleSource

Happiness: Mode + Age + VideoExperience + SampleSource

Pleasure: Mode + Age + Race + Gender + VideoExperience + SampleSource

##### *Sports Battery Statements*

TooMuch: Mode + Age + SampleSource + Device

Race: Mode + Age + Gender + VideoExperience + SampleSource + Mode\*Age

International: Mode + Age + Race + Gender + VideoExperience + SampleSource

Government: Mode + Age + Gender + VideoExperience + SampleSource



**Disclosure***Overall*

SensitivityProportion: Mode + Age + Education + Gender + VideoExperience + SampleSource + Device + Mode\*Age

SensitivityScore: Mode + Age + Education + Gender + SampleSource + VideoExperience

*Items*

CreditCardBalance: Mode + Age + Race + VideoExperience + SampleSource

ReligiousAttendance: Mode + Age + Race + Gender + VideoExperience + SampleSource

BusSeat: Mode + Age + VideoExperience + SampleSource + Device

VolunteerWork: Mode + Age + Education + Gender + VideoExperience + SampleSource

HelpHomeless: Mode + Age + VideoExperience + SampleSource + Device

LocalElections: Mode + Age + Education + Race + VideoExperience + SampleSource

SexPartnersYear: Mode + Age + VideoExperience + SampleSource

FemaleSexPartners: Mode + Age + Education + Gender + SampleSource

MaleSexPartners: Mode + Age + Race + Gender + VideoExperience + SampleSource + Mode\*Age

SexFrequency: Mode + Age + Education + Gender + VideoExperience + SampleSource + Device

SexPartnerGender: Mode + Age + VideoExperience + SampleSource + Device

PornFrequency: Mode + Age + Gender + SampleSource

## Supplementary Appendix I

### Numerical Estimates by Mode

Numerical estimates by mode. Comparisons were calculated by fitting GEE models adjusting for age, sample source, and interviewer cluster, excluding responses of zero; for the pairwise comparisons with live video, live video was the reference category, and for the comparison between web survey and prerecorded video the reference category was recorded video.

| Item             |      | Live Video<br>(n = 276) | Web Survey<br>(n = 403) | Prerecorded video<br>(n = 383) | Live Video vs.<br>Web Survey | Live Video vs.<br>Prerecorded Video | Prerecorded Video<br>vs. Web Survey |
|------------------|------|-------------------------|-------------------------|--------------------------------|------------------------------|-------------------------------------|-------------------------------------|
|                  |      | Estimates               |                         |                                | p-value                      |                                     |                                     |
| TelevisionHours  | mean | 6.573<br>(0.533)        | 7.613<br>(0.529)        | 7.398<br>(0.499)               | <b>&lt;0.001</b>             | <b>&lt;0.001</b>                    | 0.668                               |
| MovieTheaterYear | mean | 6.645<br>(0.625)        | 5.197<br>(0.463)        | 5.726<br>(0.718)               | <b>0.026</b>                 | 0.156                               | 0.248                               |
| MoviesYear       | mean | 38.184<br>(1.115)       | 30.610<br>(4.410)       | 7.708<br>(4.264)               | 0.120                        | <b>&lt;0.001</b>                    | <b>&lt;0.001</b>                    |
| RestaurantsMonth | mean | 6.269<br>(0.629)        | 3.541<br>(0.714)        | 3.614<br>(0.755)               | <b>&lt;0.001</b>             | <b>&lt;0.001</b>                    | 0.496                               |
| SpicyFood        | mean | 5.658<br>(0.271)        | 5.652<br>(1.114)        | 4.404<br>(0.899)               | 0.995                        | 0.132                               | 0.226                               |
| GroceryStore     | mean | 7.505<br>(0.559)        | 9.908<br>(1.944)        | 7.822<br>(1.238)               | 0.203                        | 0.334                               | 0.207                               |
| DrinkingWater    | mean | 27.132<br>(1.699)       | 26.395<br>(1.461)       | 25.947<br>(3.195)              | 0.825                        | 0.727                               | 0.840                               |

## Supplementary Appendix J

### Percent “Strongly Favor” or “Strongly Agree” by mode; differences presumably due at least in part to mode differences in non-differentiation

Estimates (e.g., percent of respondents choosing “strongly favor” in judging battery statements) by mode. For the pairwise comparisons with Live Video, Live Video was the reference category, and for the comparison between Web Survey and Prerecorded Video the reference category was prerecorded video.

|                               |                | Live Video<br>(n = 273) | Web Survey<br>(n = 402) | Prerecorded Video<br>(n = 383) | Live Video vs.<br>Web Survey | Live Video vs.<br>Prerecorded Video | Prerecorded Video vs.<br>Web Survey |
|-------------------------------|----------------|-------------------------|-------------------------|--------------------------------|------------------------------|-------------------------------------|-------------------------------------|
|                               |                | Estimates               |                         |                                | p-value                      |                                     |                                     |
| <b>FoodBattery</b>            |                |                         |                         |                                |                              |                                     |                                     |
| FoodBattery_FastFood          | Strongly favor | 9.1%<br>(24.2%*)        | 5.7%<br>(21.7%*)        | 11.7%<br>(20.1%*)              | 0.666                        | 0.004                               | 0.002                               |
| FoodBattery_HealthyDiet       | Strongly favor | 54.3%<br>(20.4%)        | 39.8%<br>(21.5%)        | 45.3%<br>(26.8%)               | 0.001                        | 0.055                               | 0.118                               |
| FoodBattery_Cholesterol       | Strongly favor | 43.4%<br>(19.6%)        | 37.0%<br>(19.8%)        | 38.1%<br>(28.2%)               | 0.247                        | 0.332                               | 0.788                               |
| FoodBattery_Nutritional Value | Strongly favor | 31.2%<br>(11.3%)        | 17.4%<br>(16.8%)        | 22.6%<br>(28.7%*)              | 0.135                        | 0.810                               | 0.048                               |
| FoodBattery_Food Packaging    | Strongly favor | 36.0%<br>(17.0%)        | 27.9%<br>(13.6%)        | 34.2%<br>(18.5%)               | 0.659                        | 0.089                               | 0.018                               |
| FoodBattery_MeatDiet          | Strongly favor | 10.3%<br>(20.4%*)       | 13.1%<br>(19.1%*)       | 13.2%<br>(24.9%*)              | 0.205                        | 0.030                               | 0.543                               |
| FoodBattery_FoodGroups        | Strongly favor | 42.6%<br>(11.5%)        | 28.5%<br>(13.9%)        | 31.2%<br>(20.2%)               | 0.001                        | 0.009                               | 0.421                               |
| <b>MoneyBattery</b>           |                |                         |                         |                                |                              |                                     |                                     |
| MoneyBattery_NiceThings       | Strongly agree | 18.3%<br>(22.3%*)       | 21.6%<br>(25.4%*)       | 24.8%<br>(30.6%*)              | 0.520                        | 0.188                               | 0.401                               |
| MoneyBattery_BuyAnything      | Strongly agree | 38.9%<br>(19.2%)        | 56.8%<br>(23.2%)        | 58.9%<br>(21.8%)               | 0.000                        | 0.000                               | 0.638                               |
| MoneyBattery_BuyMoreThings    | Strongly agree | 38.4%<br>(24.2%)        | 40.3%<br>(24.8%)        | 44.4%<br>(27.3%)               | 0.745                        | 0.308                               | 0.354                               |
| MoneyBattery_Bother           | Strongly agree | 17.5%<br>(28.2%*)       | 27.6%<br>(26.1%)        | 25.2%<br>(32.8%*)              | 0.042                        | 0.131                               | 0.545                               |
| MoneyBattery_Happiness        | Strongly agree | 2.3%<br>(30.4%*)        | 5.5%<br>(29.4%*)        | 6.4%<br>(50.0%*)               | 0.059                        | 0.028                               | 0.541                               |
| MoneyBattery_Pleasure         | Strongly agree | 34.3%<br>(27.9%)        | 29.0%<br>(27.3%)        | 33.8%<br>(32.3%)               | 0.243                        | 0.908                               | 0.191                               |
| <b>SportsBattery</b>          |                |                         |                         |                                |                              |                                     |                                     |
| SportsBattery_TooMuch         | Strongly agree | 13.4%<br>(19.0%*)       | 12.7%<br>(16.7%*)       | 18.2%<br>(23.6%*)              | 0.807                        | 0.184                               | 0.061                               |
| SportsBattery_Race            | Strongly agree | 39.6%<br>(15.5%)        | 18.5%<br>(17.4%)        | 27.1%<br>(24.0%)               | 0.001                        | 0.313                               | 0.001                               |
| SportsBattery_International   | Strongly agree | 6.2%<br>(59.0%*)        | 4.0%<br>(72.3%*)        | 7.0%<br>(75.2%*)               | 0.333                        | 0.790                               | 0.156                               |
| SportsBattery_Government      | Strongly agree | 5.8%<br>(46.1%*)        | 2.7%<br>(46.3%*)        | 2.3%<br>(51.3%*)               | 0.116                        | 0.085                               | 0.700                               |

## Supplementary Appendix K

### Mean sensitivity of the selected responses for each item, where sensitivity is measured by the percent of online raters judging each response as very or somewhat uncomfortable for most people to give

Comparisons were calculated by fitting GEE models (in Stata 16.0) adjusting for age, sample source, education, gender, video experience, device type, and interviewer cluster. For the pairwise comparisons with live video, live video was the reference category, and for the comparison between web survey and prerecorded video the reference category was recorded video.

|                     |                              | Live<br>Video<br>(n = 279) | Web<br>Survey<br>(n = 403) | Prerecorded<br>Video<br>(n = 385) | Live Video vs.<br>Web Survey | Live Video vs.<br>Prerecorded<br>Video | Prerecorded<br>Video vs. Web<br>Survey |
|---------------------|------------------------------|----------------------------|----------------------------|-----------------------------------|------------------------------|----------------------------------------|----------------------------------------|
|                     |                              | p-value                    |                            |                                   |                              |                                        |                                        |
| CreditCardBalance   | Mean response<br>sensitivity | 0.559<br>(0.018)           | 0.576<br>(0.017)           | 0.565<br>(0.016)                  | 0.050                        | <b>0.017</b>                           | 0.815                                  |
| ReligiousAttendance | Mean response<br>sensitivity | 0.561<br>(0.007)           | 0.578<br>(0.006)           | 0.565<br>(0.009)                  | <b>0.038</b>                 | <b>0.030</b>                           | 0.780                                  |
| BusSeat             | Mean response<br>sensitivity | 0.438<br>(0.005)           | 0.442<br>(0.004)           | 0.450<br>(0.004)                  | 0.586                        | 0.079                                  | 0.125                                  |
| VolunteerWork       | Mean response<br>sensitivity | 0.472<br>(0.016)           | 0.528<br>(0.012)           | 0.548<br>(0.020)                  | <b>0.003</b>                 | <b>&lt;0.001</b>                       | 0.217                                  |
| HelpHomeless        | Mean response<br>sensitivity | 0.474<br>(0.012)           | 0.513<br>(0.010)           | 0.539<br>(0.019)                  | <b>0.029</b>                 | <b>0.001</b>                           | <b>0.029</b>                           |
| LocalElections      | Mean response<br>sensitivity | 0.406<br>(0.018)           | 0.432<br>(0.020)           | 0.430<br>(0.025)                  | 0.718                        | 0.941                                  | 0.558                                  |
| SexPartnersYear     | Mean response<br>sensitivity | 0.592<br>(0.016)           | 0.583<br>(0.016)           | 0.594<br>(0.016)                  | 0.217                        | 0.782                                  | 0.186                                  |
| FemaleSexPartners   | Mean response<br>sensitivity | 0.817<br>(0.007)           | 0.817<br>(0.007)           | 0.811<br>(0.007)                  | 0.911                        | 0.185                                  | 0.130                                  |
| MaleSexPartners     | Mean response<br>sensitivity | 0.519<br>(0.007)           | 0.598<br>(0.009)           | 0.598<br>(0.012)                  | 0.176                        | 0.080                                  | 0.865                                  |
| SexFrequency        | Mean response<br>sensitivity | 0.764<br>(0.005)           | 0.760<br>(0.006)           | 0.771<br>(0.008)                  | 0.589                        | 0.405                                  | <b>0.036</b>                           |
| SexPartnerGender    | Mean response<br>sensitivity | 0.535<br>(0.011)           | 0.530<br>(0.009)           | 0.537<br>(0.010)                  | 0.139                        | 0.376                                  | 0.546                                  |
| PornFrequency       | Mean response<br>sensitivity | 0.615<br>(0.013)           | 0.655<br>(0.015)           | 0.659<br>(0.016)                  | <b>0.004</b>                 | <b>0.001</b>                           | 0.783                                  |

## Supplementary Appendix L

### Prevalence Estimates for Sensitive Behaviors by Mode

Comparisons were calculated by fitting GEE models (in Stata 16.0) adjusting for age, sample source, education, gender, video experience, device type, and interviewer cluster. For the pairwise comparisons with live video, live video was the reference category, and for the comparison between web survey and prerecorded video the reference category was prerecorded video.

|                                                                    |                                      | Live Video<br>(n = 273) | Web Survey<br>(n = 402) | Prerecorded Video<br>(n = 381) | Live Video vs.<br>Web Survey | Live Video vs.<br>Prerecorded Video | Prerecorded Video vs. Web Survey |
|--------------------------------------------------------------------|--------------------------------------|-------------------------|-------------------------|--------------------------------|------------------------------|-------------------------------------|----------------------------------|
|                                                                    |                                      | p-value                 |                         |                                |                              |                                     |                                  |
| <b>Percentage of respondents reporting most sensitive response</b> |                                      | 55.1%<br>(1.5%)         | 55.7%<br>(1.1%)         | 56.2%<br>(1.6%)                | 0.053                        | <b>0.004</b>                        | 0.148                            |
| Credit Card Balance                                                | Hardly ever                          | 29.6%<br>(26.3%)        | 30.9%<br>(23.4%)        | 27.9%<br>(27.2%)               | 0.761                        | 0.659                               | 0.413                            |
| Religious Attendance                                               | Never                                | 18.6%<br>(25.7%*)       | 23.7%<br>(29.3%*)       | 26.9%<br>(31.6%*)              | 0.072                        | <b>0.007</b>                        | 0.228                            |
| BusSeat                                                            | Not at all in the past year          | 36.8%<br>(20.4%)        | 33.5%<br>(15.8%)        | 43.4%<br>(28.1%)               | 0.566                        | 0.281                               | <b>0.023</b>                     |
| VolunteerWork                                                      | Not at all in the past year          | 41.1%<br>(17.1%)        | 58.8%<br>(15.4%)        | 66.2%<br>(26.3%)               | <b>0.006</b>                 | <b>&lt;0.001</b>                    | <b>0.032</b>                     |
| HelpHomeless                                                       | Not at all in the past year          | 30.2%<br>(16.3%)        | 40.0%<br>(13.2%)        | 46.1%<br>(26.9%)               | 0.089                        | <b>0.016</b>                        | 0.157                            |
| LocalElections                                                     | Never vote                           | 7.7%<br>(39.4%*)        | 12.3%<br>(37.3%*)       | 11.9%<br>(41.8%*)              | 0.087                        | 0.072                               | 0.859                            |
| SexFrequency                                                       | Not at all                           | 31.1%<br>(16.7%)        | 28.4%<br>(19.2%)        | 30.4%<br>(27.6%)               | 0.564                        | 0.869                               | 0.547                            |
| SexPartnerGender                                                   | Both male and female                 | 0.6%<br>(101.2%*)       | 0.5%<br>(86.3%*)        | 0.4%<br>(93.5%*)               | 0.181                        | 1.000                               | 0.799                            |
| PornFrequency                                                      | More than five times in last 30 days | 14.9%<br>(13.2%)        | 25.6%<br>(16.9%)        | 24.7%<br>(20.5%)               | <b>0.006</b>                 | <b>0.001</b>                        | 0.812                            |
| SexPartnersYear                                                    | 7 partners or more                   | 0.3%<br>(63.5%*)        | 0.5%<br>(79.8%*)        | 0.5%<br>(114.0%*)              | 0.474                        | 0.464                               | 0.972                            |
| FemaleSexPartners                                                  | 21 or more                           | 27.1%<br>(27.6%*)       | 16.5%<br>(21.1%*)       | 12.2%<br>(25.9%*)              | 0.056                        | <b>0.008</b>                        | 0.305                            |
| MaleSexPartners                                                    | 21 or more                           | 0.6%<br>(69.2%*)        | 0.7%<br>(58.0%*)        | 0.6%<br>(67.0%*)               | 0.434                        | 0.247                               | 0.699                            |

## Supplementary Appendix M

### Technical Problems

Percentage of reported technical problems in Live Video interviewees by respondents (n=279) or interviewers (n=9) that occurred at least once at any point during the interview, from online debriefing survey.

| Technical problem                                                              | Proportion of interviews in which respondent reported problem | Proportion of interviews in which interviewer reported problem | % problems resolved as reported by respondent | % problems resolved without intervention as reported by respondent |
|--------------------------------------------------------------------------------|---------------------------------------------------------------|----------------------------------------------------------------|-----------------------------------------------|--------------------------------------------------------------------|
| No audio                                                                       | 14.0%<br>(n=39)                                               | 13.7%<br>(n=38)                                                | 97.4%<br>(n=38)                               | 44.7%<br>(n=17)                                                    |
| Distorted or muffled speech                                                    | 14.0%<br>(n=39)                                               | 11.5%<br>(n=32)                                                | 94.9%<br>(n=37)                               | 70.3%<br>(n=26)                                                    |
| Background Noise                                                               | 6.5%<br>(n=18)                                                | 4.7%<br>(n=13)                                                 | 66.7%<br>(n = 12)                             | 100.0%<br>(n = 12)                                                 |
| Echo                                                                           | 3.6%<br>(n=10)                                                | 1.8%<br>(n=5)                                                  | 80.0%<br>(n = 8)                              | 75.0%<br>(n=6)                                                     |
| Volume too soft                                                                | 2.5%<br>(n=7)                                                 | 5.7%<br>(n=16)                                                 | 71.4%<br>(n=5)                                | 60.0%<br>(n=3)                                                     |
| Interrupted speech (interviewer and respondent were speaking at the same time) | 18.3%<br>(n=51)                                               | 9.0%<br>(n=25)                                                 | 94.1%<br>(n=48)                               | 68.8%<br>(n=33)                                                    |
| No video                                                                       | 9.0%<br>(n=25)                                                | 16.8%<br>(n=47)                                                | 92.0%<br>(n=23)                               | 30.4%<br>(n=7)                                                     |
| Frozen or distorted video                                                      | 11.5%<br>(n=32)                                               | 10.8%<br>(n=30)                                                | 90.6%<br>(n=29)                               | 72.4%<br>(n=21)                                                    |
| Trouble seeing what was on the screen clearly                                  | 17.6%<br>(n=49)                                               | 3.9%<br>(n=11)                                                 | 85.7%<br>(n=42)                               | 76.2%<br>(n=32)                                                    |
| Video and audio out of sync                                                    | 17.9%<br>(n=50)                                               | 14.0%<br>(n=39)                                                | 72.0%<br>(n=36)                               | 63.9%<br>(n=23)                                                    |

## References

- American Association for Public Opinion Research. (2016). *Standard Definitions: Final Dispositions of Case Codes and Outcome Rates for Surveys*. 9<sup>th</sup> edition.
- Callegaro, M., & DiSogra, C. (2008). Computing response metrics for online panels. *Public opinion quarterly*, 72(5), 1008-1032. <https://doi.org/10.1093/poq/nfn065>
- Fail, S., Schober, M. F., & Conrad, F. G. (2021). The time it takes to reveal embarrassing information in a mobile phone survey. *International journal of social research methodology*, 24(2), 249-264. <https://doi.org/10.1080/13645579.2020.1824629>
- Feuer, S., & Schober, M.F. (2015, May 21-24). Self-view can increase disclosure in Skype survey interviews. 27<sup>th</sup> Annual Convention of the Association for Psychological Science, New York, NY, United States.
- Feuer, S., & Schober, M.F. (2019, July 15-19). Gaze patterns and the self-view window in Skype survey interviews. 8<sup>th</sup> Conference of the European Survey Research Association, Zagreb, Croatia.
- Lind, L. H., Schober, M. F., Conrad, F. G., & Reichert, H. (2013). Why do survey respondents disclose more when computers ask the questions? *Public Opinion Quarterly*, 77(4), 888–935. <https://doi.org/10.1093/poq/nft038>
- Liu, M., & Cernat, A. (2018). Item-by-item versus matrix questions: A web survey experiment. *Social Science Computer Review*, 36(6), 690-706. <https://doi.org/10.1177/0894439316674459>
- Keusch, F., & Yan, T. (2017). Web versus mobile web: An experimental study of device effects and self-selection effects. *Social Science Computer Review*, 35(6), 751-769. <https://doi.org/10.1177/0894439316675566>
- Schober, M. F., Conrad, F. G., Antoun, C., Ehlen, P., Fail, S., Hupp, A. L., Johnston, M., Vickers, L., Yan, H.Y., & Zhang, C. (2015). Precision and disclosure in text and voice interviews on smartphones. *PloS one*, 10(6), e0128337. <https://doi.org/10.1371/journal.pone.0128337>
